# Supplementary material for: Lanthanide-Dependent Methanol Metabolism of a Proteobacteria-Dominated Community in a Light Lanthanide-Rich Deep Environment
Source: MDPI journal article supplement (doi:10.3390/ijms23073947), 2022-04-01
Supplement: s1 [file s1]

## Supplementary Materials

### Lanthanide-dependent methanol metabolism of *Proteobacteria*-dominated community in light lanthanide-rich deep environment

Agnieszka Daszczyńska<sup>1</sup>, Tomasz Krucoń<sup>2</sup>, Robert Stasiuk<sup>1</sup>, Renata Matlakowska<sup>1\*</sup>

<sup>1</sup>Department of Geomicrobiology, Institute of Microbiology, Faculty of Biology, University of Warsaw;

<sup>2</sup>Department of Environmental Microbiology and Biotechnology, Institute of Microbiology, Faculty of Biology, University of Warsaw

Correspondence: r.matlakowska@uw.edu.pl

**Table S1.** Detected genera that Semrau et al. (2010) listed as aerobic methanotrophs.

| Phylum              | Family           | Genus         | avg(genus) | Species                                | reads<br>ion21 | reads<br>ion22 | reads<br>ion23 | %<br>reads21 | %<br>reads22 | %<br>reads23 | AVG    | SD     |
|---------------------|------------------|---------------|------------|----------------------------------------|----------------|----------------|----------------|--------------|--------------|--------------|--------|--------|
| Gammaproteobacteria | Methylococcaceae | Methylobacter | 0.4085     | <i>Candidatus Methylobacter oryzae</i> | 1181           | 268            | 53             | 0.0546       | 0.0080       | 0.0335       | 0.0321 | 0.0233 |
|                     |                  |               |            | <i>Methylobacter luteus</i>            | 1974           | 348            | 62             | 0.0913       | 0.0105       | 0.0392       | 0.0470 | 0.0410 |
|                     |                  |               |            | <i>Methylobacter marinus</i>           | 390            | 49             | 16             | 0.0180       | 0.0015       | 0.0101       | 0.0099 | 0.0083 |
|                     |                  |               |            | <i>Methylobacter</i> sp. BBA5.1        | 5689           | 574            | 143            | 0.2631       | 0.0172       | 0.0904       | 0.1236 | 0.1263 |
|                     |                  |               |            | <i>Methylobacter tundripaludum</i>     | 4382           | 841            | 153            | 0.2027       | 0.0253       | 0.0967       | 0.1082 | 0.0893 |
|                     |                  |               |            | <i>Methylobacter whittenburyi</i>      | 222            | 36             | 7              | 0.0103       | 0.0011       | 0.0044       | 0.0053 | 0.0046 |
|                     |                  |               |            | unclassified <i>Methylobacter</i>      | 3434           | 726            | 106            | 0.1588       | 0.0218       | 0.0670       | 0.0825 | 0.0698 |
|                     |                  | Methylococcus | 0.0113     | <i>Methylococcus capsulatus</i>        | 305            | 111            | 26             | 0.0141       | 0.0033       | 0.0164       | 0.0113 | 0.0070 |
|                     |                  | Methylocaldum | 0.0617     | <i>Methylocaldum marinum</i>           | 607            | 146            | 21             | 0.0281       | 0.0044       | 0.0133       | 0.0152 | 0.0120 |
|                     |                  |               |            | <i>Methylocaldum</i> sp. 0917          | 60             | 13             | 5              | 0.0028       | 0.0004       | 0.0032       | 0.0021 | 0.0015 |
|                     |                  |               |            | <i>Methylocaldum</i> sp. 14B           | 67             | 22             | 4              | 0.0031       | 0.0007       | 0.0025       | 0.0021 | 0.0013 |
|                     |                  |               |            | <i>Methylocaldum</i> sp. BRCS4         | 129            | 11             | 6              | 0.0060       | 0.0003       | 0.0038       | 0.0034 | 0.0028 |
|                     |                  |               |            | <i>Methylocaldum</i> sp. SAD2          | 12             | 8              | 1              | 0.0006       | 0.0002       | 0.0006       | 0.0005 | 0.0002 |

| Phylum | Family | Genus                   | avg(genus) | Species                              | reads<br>ion21 | reads<br>ion22 | reads<br>ion23 | %<br>reads21 | %<br>reads22 | %<br>reads23 | AVG    | SD     |
|--------|--------|-------------------------|------------|--------------------------------------|----------------|----------------|----------------|--------------|--------------|--------------|--------|--------|
|        |        |                         |            | <i>Methylocaldum szegediense</i>     | 304            | 98             | 12             | 0.0141       | 0.0029       | 0.0076       | 0.0082 | 0.0056 |
|        |        |                         |            | <i>unclassified Methylocaldum</i>    | 1029           | 260            | 56             | 0.0476       | 0.0078       | 0.0354       | 0.0303 | 0.0204 |
|        |        | <i>Methylohalobius</i>  | 0.0067     | <i>Methylohalobius crimeensis</i>    | 227            | 86             | 11             | 0.0105       | 0.0026       | 0.0070       | 0.0067 | 0.0040 |
|        |        | <i>Methylomicrobium</i> | 0.2300     | <i>Methylomicrobium agile</i>        | 5450           | 929            | 176            | 0.2521       | 0.0279       | 0.1112       | 0.1304 | 0.1133 |
|        |        |                         |            | <i>Methylomicrobium alcaliphilum</i> | 184            | 56             | 13             | 0.0085       | 0.0017       | 0.0082       | 0.0061 | 0.0039 |
|        |        |                         |            | <i>Methylomicrobium buryatense</i>   | 513            | 104            | 21             | 0.0237       | 0.0031       | 0.0133       | 0.0134 | 0.0103 |
|        |        |                         |            | <i>Methylomicrobium kenyense</i>     | 696            | 141            | 35             | 0.0322       | 0.0042       | 0.0221       | 0.0195 | 0.0142 |
|        |        |                         |            | <i>Methylomicrobium</i> sp. wino1    | 1386           | 237            | 36             | 0.0641       | 0.0071       | 0.0227       | 0.0313 | 0.0294 |
|        |        |                         |            | <i>unclassified Methylomicrobium</i> | 1117           | 274            | 44             | 0.0517       | 0.0082       | 0.0278       | 0.0292 | 0.0218 |
|        |        | <i>Methylomonas</i>     | 2.5868     | <i>Methylomonas denitrificans</i>    | 2              | 2              | 0              | 0.0001       | 0.0001       | 0.0000       | 0.0001 | 0.0000 |
|        |        |                         |            | <i>Methylomonas koyamae</i>          | 16454          | 4345           | 2711           | 0.7610       | 0.1305       | 1.7131       | 0.8682 | 0.7967 |
|        |        |                         |            | <i>Methylomonas lenta</i>            | 1999           | 1048           | 148            | 0.0925       | 0.0315       | 0.0935       | 0.0725 | 0.0355 |
|        |        |                         |            | <i>Methylomonas methanica</i>        | 10661          | 8269           | 902            | 0.4931       | 0.2484       | 0.5700       | 0.4371 | 0.1679 |
|        |        |                         |            | <i>Methylomonas</i> sp. 11b          | 1201           | 284            | 59             | 0.0555       | 0.0085       | 0.0373       | 0.0338 | 0.0237 |
|        |        |                         |            | <i>Methylomonas</i> sp. DH-1         | 231            | 76             | 28             | 0.0107       | 0.0023       | 0.0177       | 0.0102 | 0.0077 |
|        |        |                         |            | <i>Methylomonas</i> sp. GJ1          | 1213           | 656            | 100            | 0.0561       | 0.0197       | 0.0632       | 0.0463 | 0.0233 |
|        |        |                         |            | <i>Methylomonas</i> sp. Kb3          | 500            | 95             | 26             | 0.0231       | 0.0029       | 0.0164       | 0.0141 | 0.0103 |
|        |        |                         |            | <i>Methylomonas</i> sp. LW13         | 268            | 68             | 22             | 0.0124       | 0.0020       | 0.0139       | 0.0094 | 0.0065 |
|        |        |                         |            | <i>Methylomonas</i> sp. LWB          | 1643           | 277            | 98             | 0.0760       | 0.0083       | 0.0619       | 0.0487 | 0.0357 |
|        |        |                         |            | <i>Methylomonas</i> sp. MK1          | 1754           | 371            | 73             | 0.0811       | 0.0111       | 0.0461       | 0.0461 | 0.0350 |
|        |        |                         |            | <i>unclassified Methylomonas</i>     | 26204          | 8985           | 2403           | 1.2120       | 0.2699       | 1.5184       | 1.0001 | 0.6507 |
|        |        | <i>Methylosoma</i>      | not found  | n/a                                  | n/a*           | n/a            | n/a            | n/a          | n/a          | n/a          | n/a    | n/a    |
|        |        | <i>Methylosarcina</i>   | 5.7403     | <i>Methylosarcina fibrata</i>        | 253415         | 39968          | 5971           | 11.7207      | 1.2005       | 3.7730       | 5.5648 | 5.4842 |
|        |        |                         |            | <i>Methylosarcina lacus</i>          | 4752           | 828            | 132            | 0.2198       | 0.0249       | 0.0834       | 0.1094 | 0.1000 |
|        |        |                         |            | <i>unclassified Methylosarcina</i>   | 3002           | 496            | 71             | 0.1388       | 0.0149       | 0.0449       | 0.0662 | 0.0647 |
|        |        | <i>Methylosphaera</i>   | not found  | n/a                                  | n/a            | n/a            | n/a            | n/a          | n/a          | n/a          | n/a    | n/a    |
|        |        | <i>Methylothermus</i>   | not found  | n/a                                  | n/a            | n/a            | n/a            | n/a          | n/a          | n/a          | n/a    | n/a    |
|        |        | <i>Crenothrix</i>       | 0.0435     | <i>Crenothrix polyspora</i>          | 1592           | 396            | 71             | 0.0736       | 0.0119       | 0.0449       | 0.0435 | 0.0309 |

| Phylum                     | Family                      | Genus                    | avg(genus) | Species                               | reads<br>ion21 | reads<br>ion22 | reads<br>ion23 | %<br>reads21 | %<br>reads22 | %<br>reads23 | AVG    | SD     |
|----------------------------|-----------------------------|--------------------------|------------|---------------------------------------|----------------|----------------|----------------|--------------|--------------|--------------|--------|--------|
|                            |                             | <i>Clonothrix</i>        | not found  | n/a                                   | n/a            | n/a            | n/a            | n/a          | n/a          | n/a          | n/a    | n/a    |
| <i>Alphaproteobacteria</i> | <i>Methylocystaceae</i>     | <i>Methylosinus</i>      | 0.0083     | <i>Methylosinus</i> sp. C49           | 12             | 7              | 1              | 0.0006       | 0.0002       | 0.0006       | 0.0005 | 0.0002 |
|                            |                             |                          |            | <i>Methylosinus</i> sp. Ce-a6         | 16             | 23             | 1              | 0.0007       | 0.0007       | 0.0006       | 0.0007 | 0.0001 |
|                            |                             |                          |            | <i>Methylosinus</i> sp. LW3           | 11             | 9              | 1              | 0.0005       | 0.0003       | 0.0006       | 0.0005 | 0.0002 |
|                            |                             |                          |            | <i>Methylosinus</i> sp. LW4           | 10             | 13             | 2              | 0.0005       | 0.0004       | 0.0013       | 0.0007 | 0.0005 |
|                            |                             |                          |            | <i>Methylosinus</i> sp. PW1           | 32             | 12             | 4              | 0.0015       | 0.0004       | 0.0025       | 0.0015 | 0.0011 |
|                            |                             |                          |            | <i>Methylosinus</i> sp. R-45379       | 17             | 1              | 0              | 0.0008       | 0.0000       | 0.0000       | 0.0003 | 0.0004 |
|                            |                             |                          |            | <i>Methylosinus sporium</i>           | 28             | 15             | 0              | 0.0013       | 0.0005       | 0.0000       | 0.0006 | 0.0007 |
|                            |                             |                          |            | <i>Methylosinus trichosporium</i>     | 0              | 3              | 0              | 0.0000       | 0.0001       | 0.0000       | 0.0000 | 0.0001 |
|                            |                             |                          |            | unclassified <i>Methylosinus</i>      | 85             | 64             | 8              | 0.0039       | 0.0019       | 0.0051       | 0.0036 | 0.0016 |
|                            |                             | <i>Methylocystis</i>     | 0.0447     | <i>Methylocystis bryophila</i>        | 28             | 34             | 7              | 0.0013       | 0.0010       | 0.0044       | 0.0022 | 0.0019 |
|                            |                             |                          |            | <i>Methylocystis heyeri</i>           | 53             | 38             | 4              | 0.0025       | 0.0011       | 0.0025       | 0.0020 | 0.0008 |
|                            |                             |                          |            | <i>Methylocystis hirsuta</i>          | 59             | 41             | 6              | 0.0027       | 0.0012       | 0.0038       | 0.0026 | 0.0013 |
|                            |                             |                          |            | <i>Methylocystis parvus</i>           | 84             | 81             | 7              | 0.0039       | 0.0024       | 0.0044       | 0.0036 | 0.0010 |
|                            |                             |                          |            | <i>Methylocystis rosea</i>            | 85             | 112            | 6              | 0.0039       | 0.0034       | 0.0038       | 0.0037 | 0.0003 |
|                            |                             |                          |            | <i>Methylocystis</i> sp. ATCC 49242   | 89             | 87             | 4              | 0.0041       | 0.0026       | 0.0025       | 0.0031 | 0.0009 |
|                            |                             |                          |            | <i>Methylocystis</i> sp. B8           | 104            | 152            | 5              | 0.0048       | 0.0046       | 0.0032       | 0.0042 | 0.0009 |
|                            |                             |                          |            | <i>Methylocystis</i> sp. MitZ-2018    | 22             | 33             | 6              | 0.0010       | 0.0010       | 0.0038       | 0.0019 | 0.0016 |
|                            |                             |                          |            | <i>Methylocystis</i> sp. SB2          | 11             | 6              | 1              | 0.0005       | 0.0002       | 0.0006       | 0.0004 | 0.0002 |
|                            |                             |                          |            | <i>Methylocystis</i> sp. SC2          | 26             | 49             | 2              | 0.0012       | 0.0015       | 0.0013       | 0.0013 | 0.0001 |
|                            |                             |                          |            | unclassified <i>Methylocystis</i>     | 337            | 551            | 42             | 0.0156       | 0.0166       | 0.0265       | 0.0196 | 0.0061 |
|                            | <i>Beijerinckaceae</i>      | <i>Methylocapsa</i>      | 0.0073     | <i>Methylocapsa acidiphila</i>        | 28             | 39             | 3              | 0.0013       | 0.0012       | 0.0019       | 0.0015 | 0.0004 |
|                            |                             |                          |            | <i>Methylocapsa aurea</i>             | 40             | 36             | 5              | 0.0019       | 0.0011       | 0.0032       | 0.0020 | 0.0011 |
|                            |                             |                          |            | <i>Methylocapsa palsarum</i>          | 41             | 26             | 1              | 0.0019       | 0.0008       | 0.0006       | 0.0011 | 0.0007 |
|                            |                             |                          |            | <i>Methylocapsa</i> sp. S129          | 66             | 68             | 3              | 0.0031       | 0.0020       | 0.0019       | 0.0023 | 0.0006 |
|                            |                             |                          |            | unclassified <i>Methylocapsa</i>      | 8              | 5              | 1              | 0.0004       | 0.0002       | 0.0006       | 0.0004 | 0.0002 |
|                            |                             | <i>Methylocella</i>      | 0.0062     | <i>Methylocella silvestris</i>        | 105            | 82             | 10             | 0.0049       | 0.0025       | 0.0063       | 0.0045 | 0.0019 |
|                            |                             |                          |            | <i>Methylocella tundrae</i>           | 29             | 53             | 2              | 0.0013       | 0.0016       | 0.0013       | 0.0014 | 0.0002 |
|                            |                             |                          |            | unclassified <i>Methylocella</i>      | 2              | 1              | 1              | 0.0001       | 0.0000       | 0.0006       | 0.0003 | 0.0003 |
| <i>Verrucomicrobia</i>     | <i>Methylacidiphilaceae</i> | <i>Methylacidiphilum</i> | 0.0078     | <i>Methylacidiphilum fumariolicum</i> | 10             | 9              | 3              | 0.0005       | 0.0003       | 0.0019       | 0.0009 | 0.0009 |

| Phylum | Family | Genus | avg(genus) | Species                               | reads<br>ion21 | reads<br>ion22 | reads<br>ion23 | %<br>reads21 | %<br>reads22 | %<br>reads23 | AVG    | SD     |
|--------|--------|-------|------------|---------------------------------------|----------------|----------------|----------------|--------------|--------------|--------------|--------|--------|
|        |        |       |            | <i>Methylacidiphilum infernorum</i>   | 22             | 35             | 5              | 0.0010       | 0.0011       | 0.0032       | 0.0017 | 0.0012 |
|        |        |       |            | <i>Methylacidiphilum kamchatkense</i> | 10             | 5              | 0              | 0.0005       | 0.0002       | 0.0000       | 0.0002 | 0.0002 |
|        |        |       |            | <i>Methylacidiphilum</i> sp. Phi      | 30             | 22             | 3              | 0.0014       | 0.0007       | 0.0019       | 0.0013 | 0.0006 |
|        |        |       |            | <i>Methylacidiphilum</i> sp. Yel      | 13             | 6              | 0              | 0.0006       | 0.0002       | 0.0000       | 0.0003 | 0.0003 |
|        |        |       |            | unclassified <i>Methylacidiphilum</i> | 85             | 81             | 6              | 0.0039       | 0.0024       | 0.0038       | 0.0034 | 0.0008 |

\* n/a - not applicable

**Table S2.** Methane monooxygenase sequences detected in the metaproteome and metagenome of the studied microbial community.

| NCBI sequence no.  | Description                                                          | Genus/Species                 | Order (Class)                             |
|--------------------|----------------------------------------------------------------------|-------------------------------|-------------------------------------------|
| Metagenomic data   |                                                                      |                               |                                           |
| WP_202053531       | methane/ammonia monooxygenase subunit A [EC:1.14.18.3<br>1.14.99.39] | Methyломicrobium sp. RS1      | Methylococcales<br>(Gammaproteobacteria)  |
| WP_020564882       | methane/ammonia monooxygenase subunit B                              | Methylosarcina fibrata        |                                           |
| WP_202053530       | methane/ammonia monooxygenase subunit B                              | Methyломicrobium sp. RS1      |                                           |
| WP_150047786       | methane/ammonia monooxygenase subunit B                              | Methylomonas rhizoryzae       |                                           |
| WP_192392143       | methane/ammonia monooxygenase subunit B                              | Methylomonas sp. EbB          |                                           |
| WP_020564880       | methane/ammonia monooxygenase subunit C                              | Methylosarcina fibrata        |                                           |
| WP_026223479       | methane/ammonia monooxygenase subunit C                              | Methylosarcina fibrata        |                                           |
| Metaproteomic data |                                                                      |                               |                                           |
| WP_014892305       | methane monooxygenase                                                | Methylocystis sp. SC2         | Hyphomicrobiales<br>(Alphaproteobacteria) |
| WP_018408664       | MULTISPECIES: methane monooxygenase                                  | Methylocystis                 | Methylococcales<br>(Gammaproteobacteria)  |
| WP_013817027       | methane monooxygenase                                                | Methylomonas methanica        |                                           |
| WP_018408664       | methane monooxygenase                                                | Methylomonas sp. MK1          |                                           |
| WP_020564882       | methane monooxygenase                                                | Methylosarcina fibrata        |                                           |
| BAE86886           | methane monooxygenase protein B                                      | Methyломicrobium japonense    |                                           |
| BAH22841           | methane monooxygenase protein C                                      | Methylomarinum vadi           |                                           |
| WP_064028764       | methane monooxygenase/ammonia monooxygenase subunit B                | Methylomonas koyamae          |                                           |
| WP_064028760       | methane monooxygenase/ammonia monooxygenase subunit C                | Methylomonas koyamae          |                                           |
| BAJ17642           | particulate methane monooxygenase B-subunit                          | Methylovulum miyakonense HT12 |                                           |
| BAJ17640           | particulate methane monooxygenase G-subunit                          | Methylovulum miyakonense HT12 |                                           |
| ACE95894           | particulate methane monooxygenase subunit A                          | Methylomonas methanica        |                                           |
| WP_010961049       | particulate methane monooxygenase subunit alpha                      | Methylococcus capsulatus      |                                           |

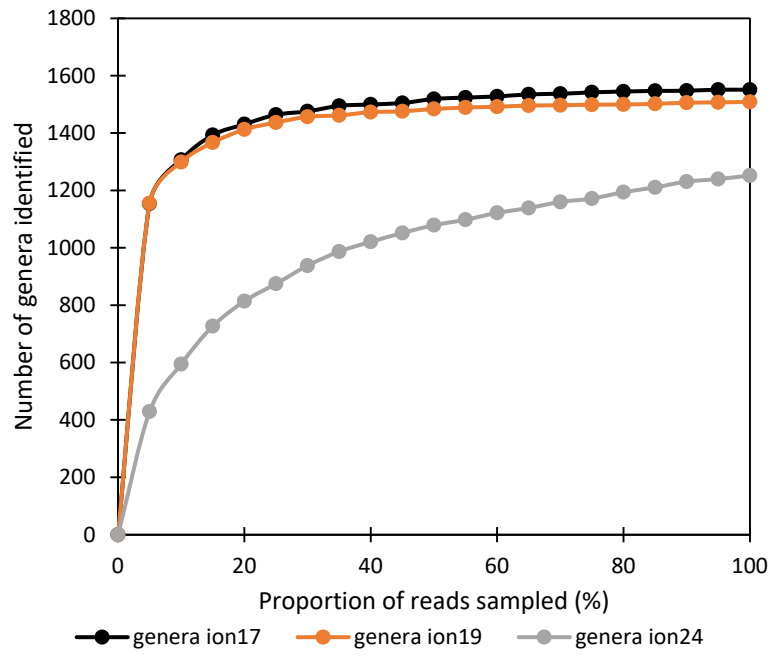

**Figure S1.** Rarefaction curves representing the relationship between the number of taxa as a function of sequencing depth (proportion of reads sampled). Rarefaction analysis showed that sequencing saturation was achieved almost for all samples.
